# Supplementary material
Source: MDPI journal article supplement (https://www.mdpi.com/2073-4344/12/7/723)
Supplement: s1 [file s1 › catalysts-1780301-supplementary.pdf]

# Supplementary Materials

## 1. The mechanism of catalytic CO<sub>2</sub> desorption.

The mechanism of Catalytic desorption have been published repeatedly. A recent review of 2020 categorized most mechanisms. The mechanism was originally proposed by the author in the Patent [1], and it was not provided into the text to avoid duplication.

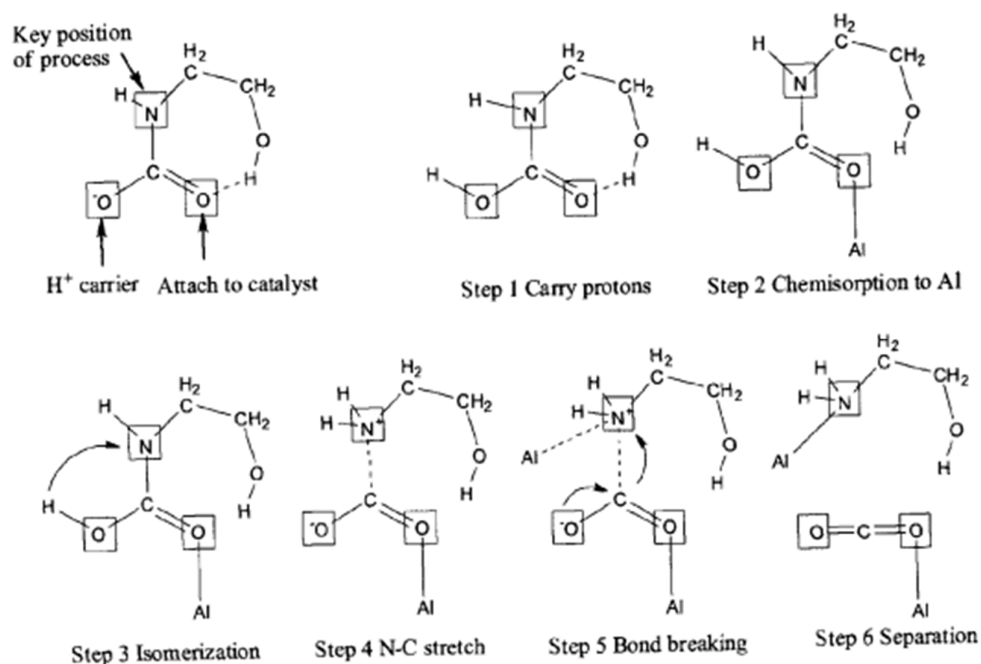

**Figure S1.** The mechanism of catalytic CO<sub>2</sub> desorption and carbamate breakdown.

2. The diagram of the desorber process.

The CO<sub>2</sub> desorption process has been published repeatedly, and the Picture was provided as follows.

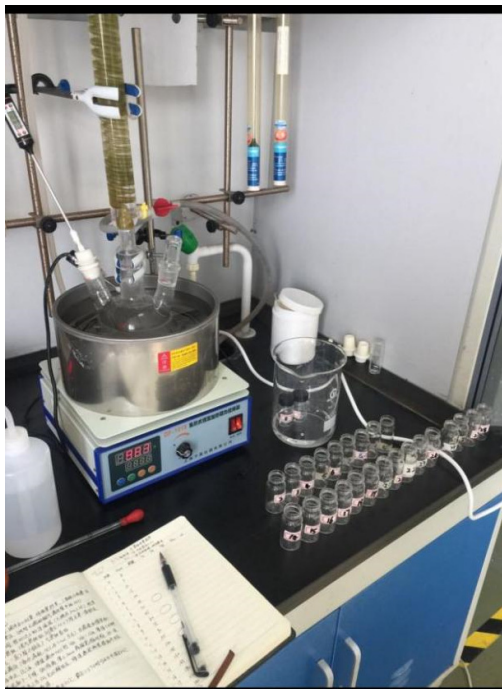

**Figure S2.** The picture of CO<sub>2</sub> desorber process.

Reference:

1. R. Idem, H. Shi et al. Catalytic Method and Apparatus for Separating a Gaseous Component from an Incoming Gas Stream US patent 2013/ 0108532 A1
